# Supplementary material
Source: PubMed Central journal article supplement (PMC3457098)
Supplement: AEM.01071-12_zam999103764so1.pdf [file AEM.01071-12_zam999103764so1.pdf]

## SUPPLEMENTAL INFORMATION

### **Long-term Cu exposure selects for Cu-tolerant bacterial communities with altered composition, but unaltered richness**

Jeanette Berg<sup>1</sup>, Kristian K. Brandt<sup>1</sup>, Waleed A. Al-Soud<sup>2</sup>, Peter E. Holm<sup>3</sup>, Lars H. Hansen<sup>2</sup>, Søren J. Sørensen<sup>2</sup>, and Ole Nybroe<sup>1#</sup>

<sup>1</sup>Department of Agriculture and Ecology, University of Copenhagen, Thorvaldsensvej 40, DK-1871 Frederiksberg C

<sup>2</sup>Department of Biology, University of Copenhagen, Sølvgade 53H, DK-1307 Copenhagen K

<sup>3</sup>Department of Basic Sciences and Environment, University of Copenhagen, Thorvaldsensvej 40, DK-1871 Frederiksberg C

**Correspondence:** Ole Nybroe, Genetics and Microbiology Section, Department of Agriculture and Ecology, University of Copenhagen, Thorvaldsensvej 40, DK-1871 Frederiksberg C, Denmark.

Tel.: +45 3533 2629; fax: +45 35282606. E-mail: oln@life.ku.dk

Includes 5 pages and 4 figures (S1-S4).

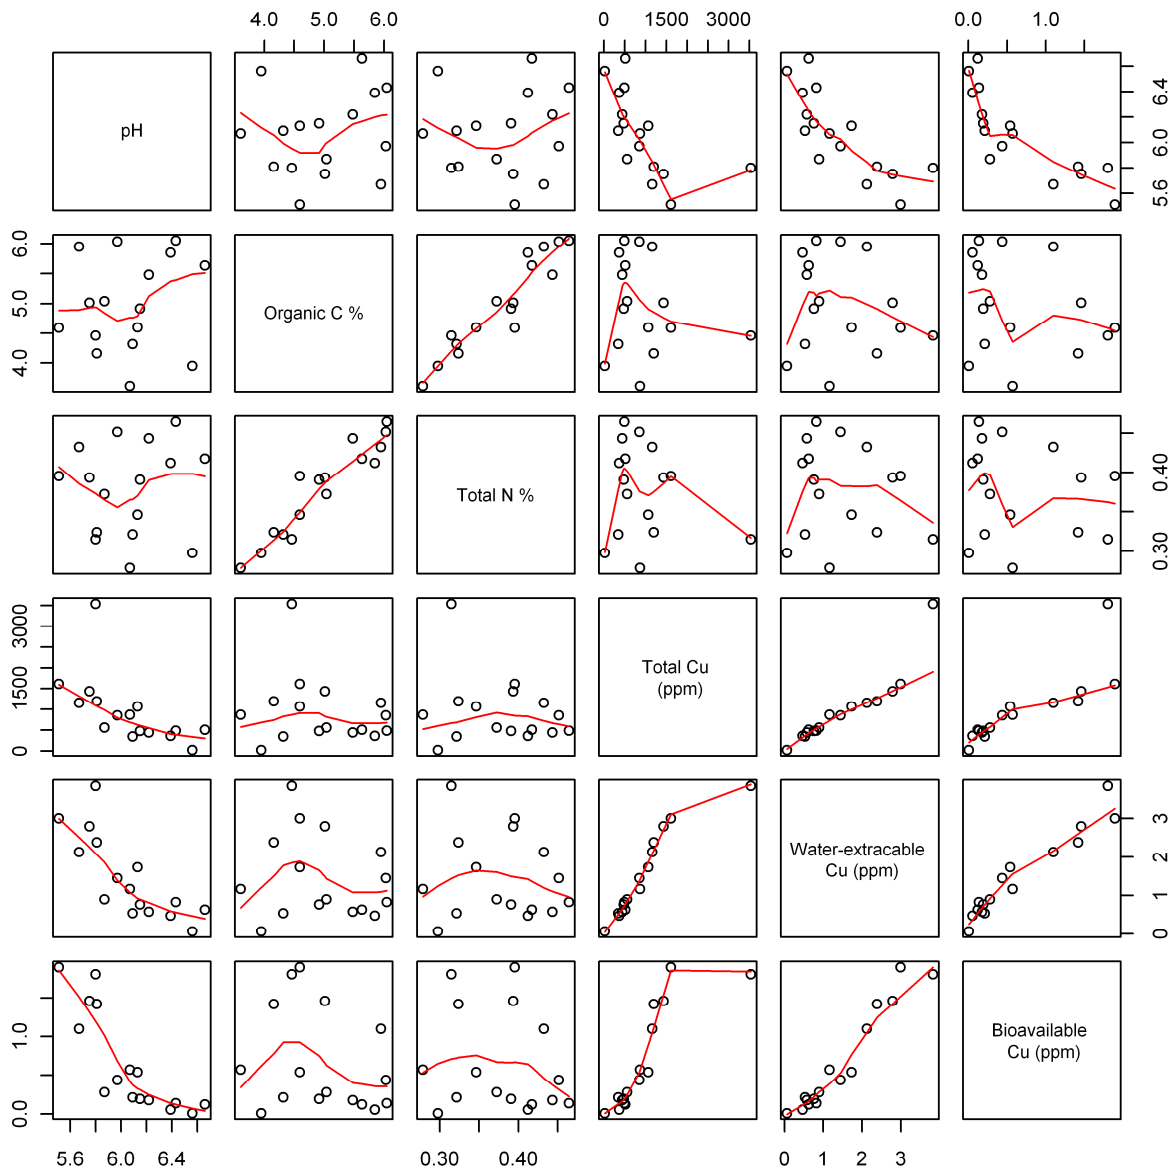

**Figure S1** Pair wise correlation plots for the 16 Cu gradient soil samples with the explanatory variables named in the columns and the response variables named in the rows.

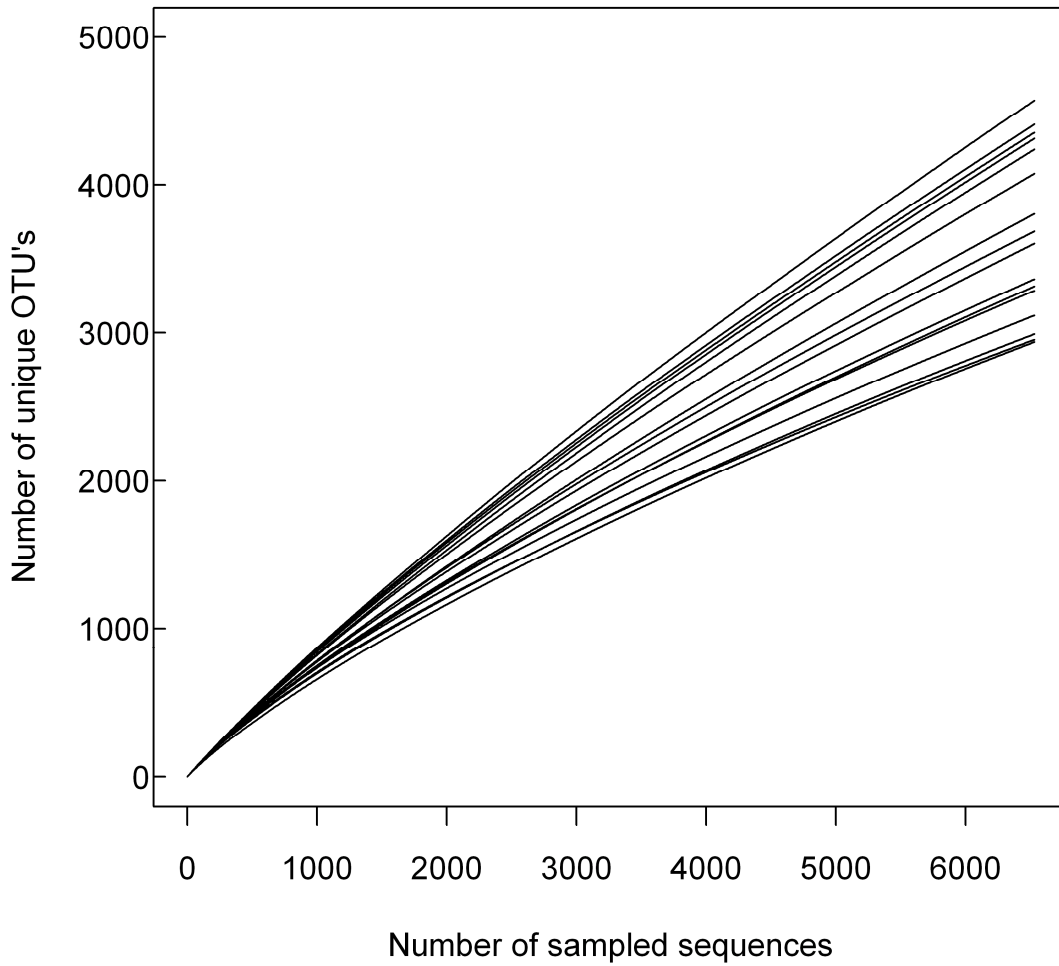

**Figure S2** Rarefaction plot showing numbers of unique operational taxonomic units (OTUs) defined at the  $\geq 97\%$  sequence similarity level for a sampling effort of 6538 sequences for the 16 soil samples.

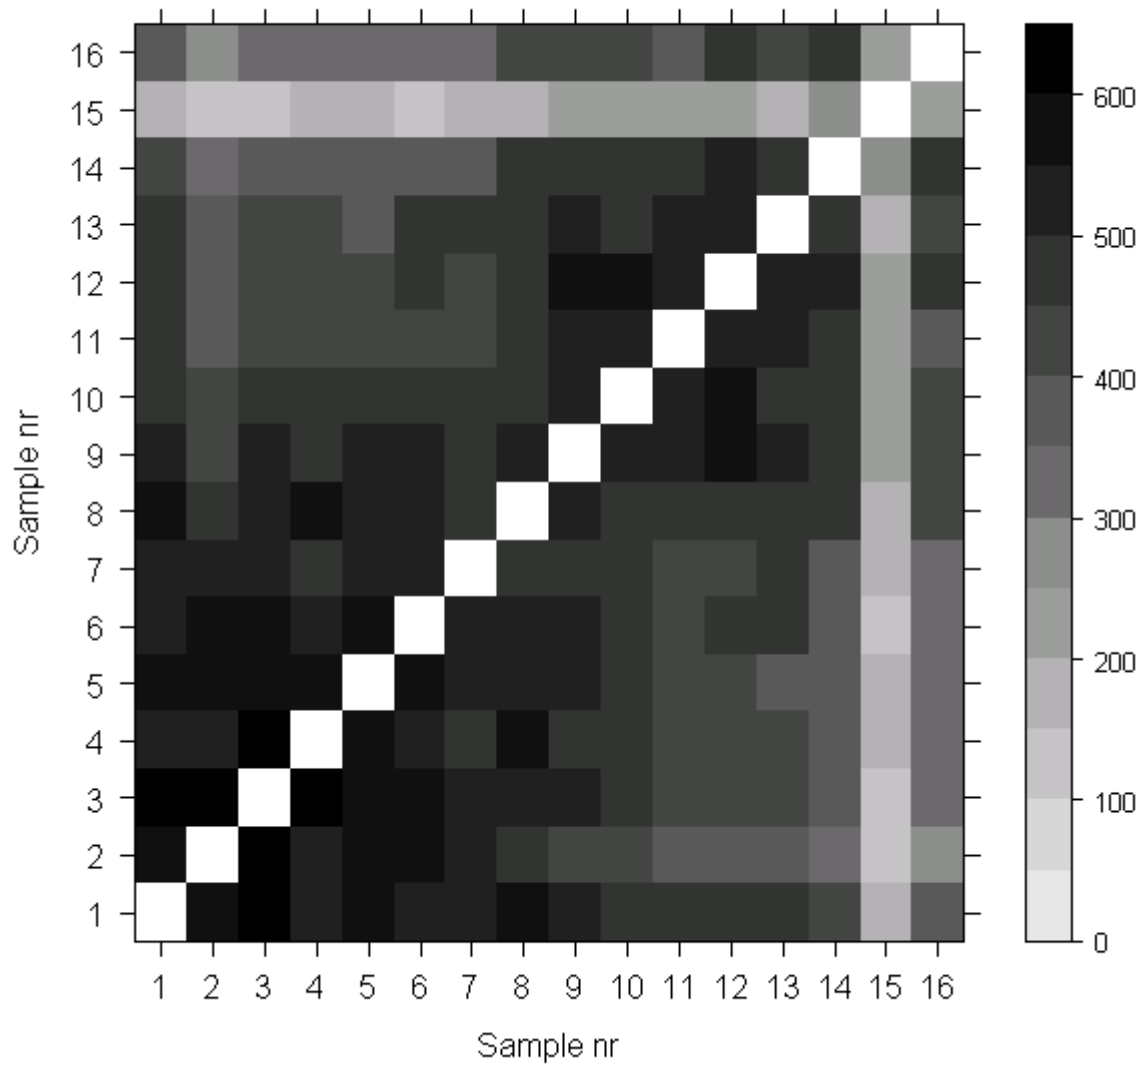

**Figure S3** Number of shared operational taxonomic units among 6538 randomly selected 16S rRNA gene sequences per Cu gradient soil sample.

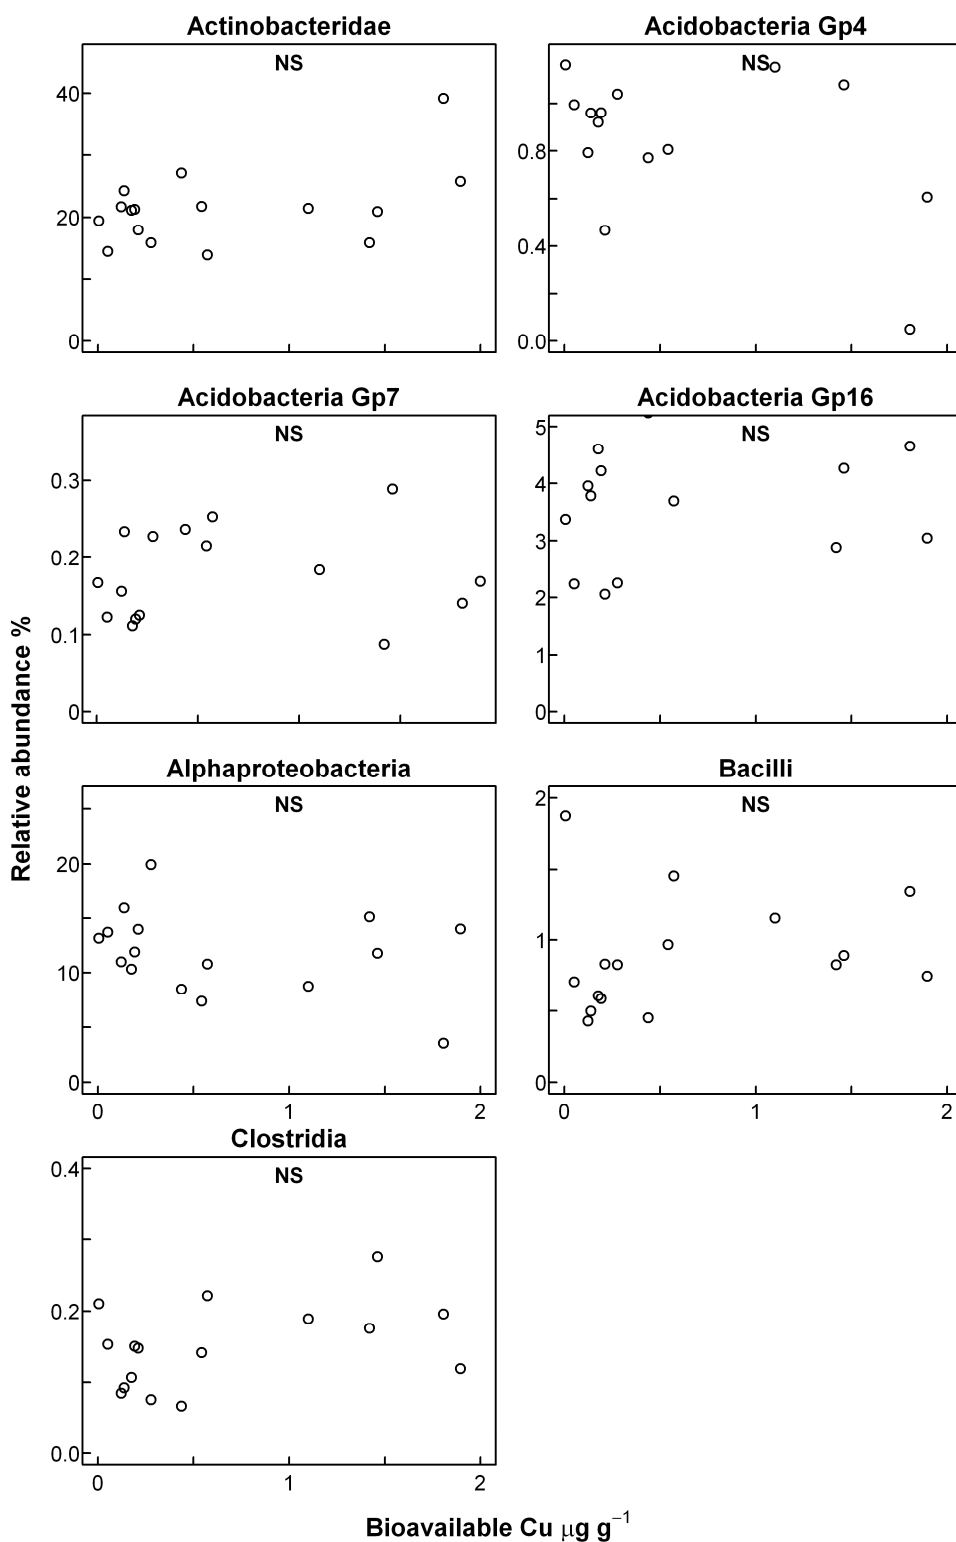

**Figure S4** Relative abundance of high-abundant classes showing no significant correlation (Spearman rank correlation test) to bioavailable Cu in the 16 Cu gradient soil samples. NS = Not Significant.
